# Supplementary material
Source: Springer Nature journal article supplement (https://www.springermedizin.de/resource/supplementary/12967_2014_1850_MOESM1_ESM.pdf/9574960)
Supplement: MOESM1 [file 9574960]

**A**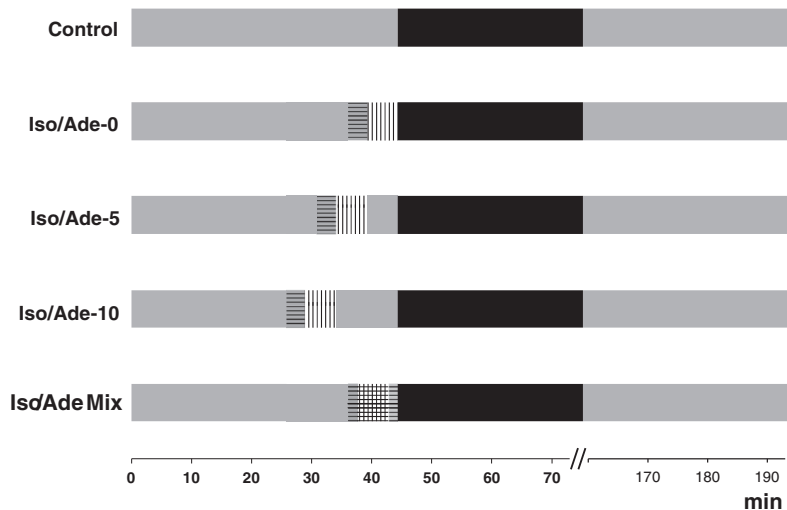**B**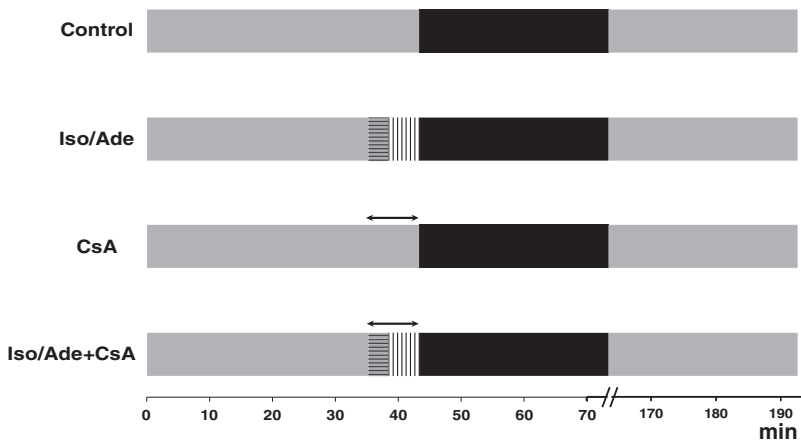

Krebs-Henseleit perfusion
  3 min perfusion with Iso at 5 nM (A) or 10 nM (B) in Iso/Ade groups. 1.5 min in Iso/Ade Mix group (A).
  5 min perfusion with 5 nM Iso + 30  $\mu$ M Ade

5 min perfusion with 30  $\mu$ M Ade
  8 min perfusion with 0.2  $\mu$ M CsA
  Global Normothermic Ischaemia
